# Supplementary material for: Thioredoxin-1 decreases alpha-synuclein induced by MPTP through promoting autophagy-lysosome pathway
Source: Springer Nature journal article supplement (doi:10.1038/s41420-024-01848-0), 2024-02-22
Supplement: 41420_2024_1848_MOESM1_ESM.pdf [file 41420_2024_1848_MOESM1_ESM.pdf]

**Supplementary Figure 1. Effect of Trx-1 on  $\alpha$ -syn mRNA level in the SNpc in MPTP-treated mice.**

The mRNA level of  $\alpha$ -syn was increased MPTP, which was suppressed by Trx-loverexpressing (**A**), and further increased by Trx-1 knockdown (**B**). Each bar represents the mean  $\pm$  SEM (n = 6). \*  $P < 0.05$ , \*\*  $P < 0.01$ , \*\*\*  $P < 0.001$ , statistically significant.



**Supplementary Figure 2. Effect of Trx-1 on expression of cathepsin B in the SNpc in MPTP-treated mice.**

The expression of cathepsin B in the SNpc was detected by Western blot analysis after administration with MPTP. The expression of cathepsin B was decreased by MPTP, which was restored in Trx-1 overexpressing transgenic (Tg) mice (A) and was further decreased in Trx-1 knockdown in the SNpc in mice (B). Each bar represents the mean  $\pm$  SEM (n = 6). \*  $P < 0.05$ , \*\*\*  $P < 0.001$ , statistically significant.



**Supplementary Figure 3. Effects of Trx-1 on expression of LAMP2 in the SNpc in MPTP-treated mice.**

The expression of LAMP2 in the SNpc was detected by Western blot analysis. The expression of LAMP2 was decreased by MPTP, which was restored in Trx-1 overexpressing transgenic (Tg) mice (A) and was further decreased in Trx-1 knockdown in the SNpc in mice (B). Each bar represents the mean  $\pm$  SEM (n = 6). \*  $P < 0.05$ , \*\*\*  $P < 0.001$ , statistically significant.

$\alpha$ -syn



asyn

-----

-----

-----

-----

-----

-----

-----

-----

-----

-----

-----



Colony 1



Colony 1



Colony 1



Colony 1



Colony 1



Cathepsin 1



Cathepsin 1



$\beta$ -actin



Cathepsin 2



Cathepsin 2



$\beta$ -actin



Cathepsin D  
1



← 33 ~ 26

Cathepsin D  
1



Cathepsin D  
1



Cathepsin D  
1



$\beta$ -actin  
1



$\beta$ -actin  
1



Cathepsin D  
2



Cathepsin D  
2



Cathepsin D  
2



Cathepsin D  
2



$\beta$ -actin  
2



$\beta$ -actin  
2





LG3h1



LG3h1



LG3h1



LG3h1



LG3h1  
β-actin



LG3h1  
β-actin



LG3h2



LG3h2



LG3h2



LG3h2  
β-actin



β-actin  
LG3h2







Parkin



$\beta$



Parkin



C M N NM S SM

B



Parkin



$\beta$



3

Parkin



G

M

T

TM

$\beta$



Tu-1 (P3) 2019 11/02 Sep 15



P3K •



20 17 549c

PLK

A



2019. 10. 10



✓



SMPCE 2021426

PINK  
Tm-10  
B



C M T TM



$\beta$ -actin  
B



C M T TM



S1 TH



S1 TH



TH S1



TH S1



TH S1



TH S1

$\beta$ -actin



TH S1

$\beta$ -actin



TH S1

$\beta$ -actin





TH1



TH1



TH1



$\beta$ -actin



$\beta$ -actin





# PV 衍表达



Tro-1  
1



✓

Tro-1  
1



✓

Tro-1  
1



Tro-1  
1



$\beta$ -actin  
1



✓

$\beta$ -actin  
1



$\beta$ -actin  
1



Trp-2  
2



Trp-1  
2



Trp-1  
2



— C — M — T — TM

$\beta$ -actin  
2



$\beta$ -actin  
2



$\beta$ -actin  
2



CB



Fam





TvV 高表达 Cathepsin B SNPC 2023.12.8



LAMP2



LAMP2



LAMP2



$\beta$ -actin



$\beta$ -actin



Lamp 2-2



Lamp 2-2



Lamp 2-2





2021.10.19. Trx 低表达模型 SNpc

Cathepsin D



C M N NM S SM
